# Supplementary material for: Molecular Recognition and In-Vitro-Targeted Inhibition of Renal Cell Carcinoma Using a DNA Aptamer
Source: PubMed Central journal article supplement — Mol Ther Nucleic Acids. 2018 Aug 4;12:758–68. doi: 10.1016/j.omtn.2018.07.015 (PMC6108068; doi:10.1016/j.omtn.2018.07.015), 2018-08-04
Supplement: mmc1.pdf [file mmc1.pdf]

OMTN, Volume 12

## Supplemental Information

**Molecular Recognition**

**and *In-Vitro*-Targeted Inhibition**

**of Renal Cell Carcinoma Using a DNA Aptamer**

**Hui Zhang, Zhibo Wang, Lin Xie, Yibin Zhang, Tanggang Deng, Jianglin Li, Jing Liu, Wei Xiong, Lei Zhang, Lin Zhang, Bo Peng, Leye He, Mao Ye, Xiaoxiao Hu, and Weihong Tan**

## Supplemental Information

**Supplemental Table S1 Sequences and secondary structures of swan library**

| Name  | Sequences (5' → 3')                                                                      | Secondary structure                                                                   |
|-------|------------------------------------------------------------------------------------------|---------------------------------------------------------------------------------------|
| SW-1  | ACCGACCGTGCTGGACTCATAGTAGGGGGCATGAA<br>ATAGGGAAGGTGGTGTGGGTGTAGACTATGAGCGA<br>GCCTGGCG   | 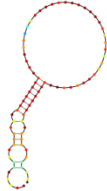   |
| SW-4  | ACCGACCGTGCTGGACTCATAGGGTTAGGGGCTGCT<br>GGCCAGATATTCAGATGGTAGGGTTACTATGAGCGA<br>GCCTGGCG |    |
| SW-5  | ACCGACCGTGCTGGACTCAGGCGGTTTGTTAAGTGG<br>GTGGAGTAGGGGTAGGCGGGTTAACTATGAGCGAG<br>CCTGGCG   |  |
| SW-13 | ACGCTCGGATGCCACTACAGACTCTTACTCGCCTAT<br>CTCTCTTACTCCTCCCTCTTCTGTACCAGCACGTCC<br>ATGAG    |  |
| SW-14 | ACGCTCGGATGCCACTACAGAGTCTCGTCTGGTTTG<br>CTGAGGTGGGCGACGGTGAAAAGAGTCACCAGCAC<br>GTCCATGAG |  |
| SW-15 | ACGCTCGGATGCCACTACAGCAAGGTGCAAATTGA<br>AGGGGGTGGGTTGGGATGGTTGGTGTACCAGCAC<br>GTCCATGAG   |  |

|       |                                                                                          |                                                                                       |
|-------|------------------------------------------------------------------------------------------|---------------------------------------------------------------------------------------|
| SW-16 | ACGCTCGGATGCCACTACAGTGGCATCGTGGTATCC<br>GTCGTAGAAGAAAGTGGTGGCATGTCACCAGCACG<br>TCCATGAG  | 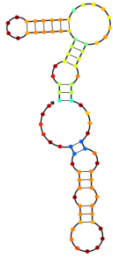   |
| SW-17 | ACGCTCGGATGCCACTACAGGCAGGAGAGCTGATT<br>CCGGGCGTAGAAAGTAAAATTTGTGTCACCAGCAC<br>GTCCATGAG  |    |
| SW-19 | ACGCTCGGATGCCACTACAGGTTGGGGTCGGGCAT<br>GCGTCCGGAGAAGGGCAAACGAGAGGTCACCAGCA<br>CGTCCATGAG |    |
| SW-20 | ACGCTCGGATGCCACTACAGCCCTCTCGCACTCTCT<br>CAAATCCGAGCCATCCGATGCTTTGTCACCAGCACG<br>TCCATGAG |   |
| SW-21 | ACGCTCGGATGCCACTACAGGCAGACGAGGAGAGA<br>GCGGTTGTATTTGAGTGTAAGTGTACCAGCAC<br>GTCCATGAG     |  |
| SW-22 | ACGCTCGGATGCCACTACAGTGGGTGTTCCGACATC<br>CGAGAGCTTGAATAGTGGCGTATAGTCACCAGCAC<br>GTCCATGAG |  |
| SW-27 | ACGCTCGGATGCCACTACAGAGGACGTCGGCGAAA<br>TTAATAGGTCCTCATGGACGTGCTGGTGAC                    |  |

|       |                                                                                                   |                                                                                       |
|-------|---------------------------------------------------------------------------------------------------|---------------------------------------------------------------------------------------|
| SW-30 | ACGCTCGGATGCCACTACAGGCGAAATTGTACGATT<br>AAAGAGAGGTTAGGCAATTAGTCACTCATGGACGT<br>GCTGGTGAC          |    |
| SW-31 | ACGCTCGGATGCCACTACAGTGGCACGAGGAGGGG<br>ATGTGGTTTGCTGAGGTGGGCTCCCCTCATGGACGT<br>GCTGGTGAC          |    |
| SW-32 | ACGCTCGGATGCCACTACAGTGGTGAGTCTCCGTGA<br>GGGAGTTCGTAAATAGACGCGAGCCTCATGGACGT<br>GCTGGTGAC          |    |
| SW-33 | ACGCTCGGATGCCACTACAGGCTCAGGGGGGGCTG<br>CGATCGGCGATCGGGGTAGCTGGCTCATGGACGTG<br>CTGGTGAC            |    |
| SW-34 | ACGCTCGGATGCCACTACAGGCATAAGCGATTAGT<br>CAATTTATTGTGTGGGATAAATAAGATAAACTCATG<br>GACGTGCTGGTGAC     |  |
| SW-35 | ACGCTCGGATGCCACTACAGCAGTTATACGAGAAG<br>AGAAAGCTCAACGAGGTTAGGTAAGTACTAGGACCTCA<br>TGGACGTGCTGGTGAC |  |
| SW-36 | ACGCTCGGATGCCACTACAGGTAGTGAGTCGAAAT<br>GGTTTGCTGCGGTGGGCAGACTCATGGACGTGCTGG<br>TGAC               |  |
| SW-37 | ACGCTCGGATGCCACTACAGAGCAGGACAGGAGGT<br>GGTTTTGGGTCTAGGGTAGGGGAGGCTCATGGACG<br>TGCTGGTGAC          |  |
| SW-38 | ATCCAGAGTGACGCAGCACCCGGAGAACATTGAGG<br>ATAGGTTGTGGACACGGTGGCTTAGT                                 |  |

|       |                                                                   |                                                                                       |
|-------|-------------------------------------------------------------------|---------------------------------------------------------------------------------------|
| SW-39 | ATCCAGAGTGACGCAGCATCTAGACTGTTGAGACTT<br>GGGTTTGTGGACACGGTGGCTTAGT | 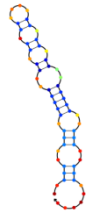   |
| SW-40 | ATCCAGAGTGACGCAGCAGACTGTTGAGACTGATT<br>AGTTATTATGGACACGGTGGCTTAGT |    |
| SW-41 | ATCCAGAGTGACGCAGCATGTAGACTGTTGAGACTT<br>CTGTTTGTGGACACGGTGGCTTAGT |    |
| SW-42 | ATCCAGAGTGACGCAGCATATCGGGTTGGTAGGGG<br>TTGGTTGATGGACACGGTGGCTTAGT |   |
| SW-43 | ATCCAGAGTGACGCAGCATCTAGACTGTTGAGACT<br>GGTGTTTGTGGACACGGTGGCTTAGT |  |
| SW-44 | ATCCAGAGTGACGCAGCATCTAGACTGTTGAGACT<br>GGGGTTGTGGACACGGTGGCTTAGT  |  |
| SW-45 | ATCCAGAGTGACGCAGCATATAGACTGTTGAGACTT<br>TTGTTTGTGGACACGGTGGCTTAGT |  |

|       |                                                                                 |                                                                                     |
|-------|---------------------------------------------------------------------------------|-------------------------------------------------------------------------------------|
| SW-46 | <p>ATCCAGAGTGACGCAGCATGTGGACTGTTGAGACC<br/>GCTGTTTGTGGACACGGTGGCTTAGT</p>       | 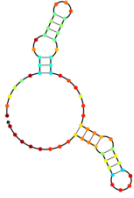 |
| SW-47 | <p>ATCCAGAGTGACGCAGCAGCTTGGGATCTCGGTGG<br/>CTGTTCTCTGGACACGGTGGCTTAGT</p>       |  |
| SW-50 | <p>ATCCAGAGTGACGCAGCAGGTTGAAATGATTAATC<br/>CGCAATATTCTTATTGGACACGGTGGCTTAGT</p> |  |

**Supplemental Table S2 Truncated sequences of SW-4**

| <b>Name</b>   | <b>Sequences (5' → 3')</b>                                                           |
|---------------|--------------------------------------------------------------------------------------|
| SW-4 (1-80)   | ACCGACCGTGCTGGACTCATAGGGTTAGGGGCTGCTGGCCA<br>GATATTCAGATGGTAGGGTTACTATGAGCGAGCCTGGCG |
| SW-4a (6-76)  | CCGTGCTGGACTCATAGGGTTAGGGGCTGCTGGCCAGATATT<br>CAGATGGTAGGGTTACTATGAGCGAGCCT          |
| SW-4b (15-68) | ACTCATAGGGTTAGGGGCTGCTGGCCAGATATTCAGATGGTA<br>GGGTTACTATGA                           |
| SW-4c (20-61) | TAGGGTTAGGGGCTGCTGGCCAGATATTCAGATGGTAGGGTT                                           |
| SW-4d (10-73) | GCTGGACTCATAGGGTTAGGGGCTGCTGGCCAGATATTCAGA<br>TGGTAGGGTTACTATGAG                     |
| SW-4e (22-61) | GGGTTAGGGGCTGCTGGCCAGATATTCAGATGGTAGGGTT                                             |
